# Supplementary material
Source: PubMed Central journal article supplement (PMC2584715)
Supplement: 0807761105_0807761105SI.pdf [file 0807761105_0807761105SI.pdf]

# Supporting Information

Kaur et al. 10.1073/pnas.0807761105

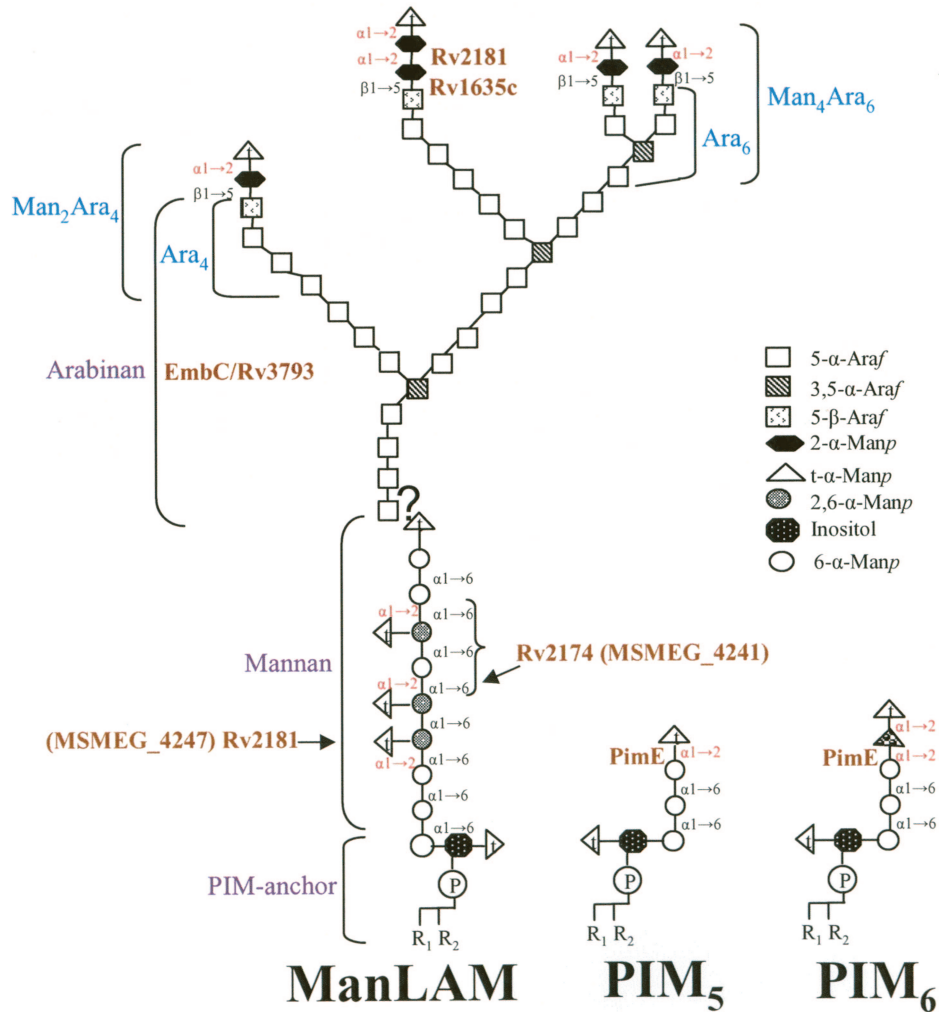

**Fig. S1.** Schematic structure of ManLAM, PIM<sub>5</sub> and PIM<sub>6</sub>. A representation of the structure of ManLAM shows the mannose-capped nonreducing termini, the mannan core, and the phosphatidylinositolmannoside anchor. Although LAM could have a few arabinan chains (not confirmed with data), only 1 chain is shown for simplicity, and not all arabinan termini are capped. The mannan core is characterized by an  $\alpha(1\rightarrow6)$ -linked mannan, substituted at C2 by  $\alpha(1\rightarrow2)$  Manp residues. ManLAM is characterized by mono-, di, and tri-Manp caps. PIM<sub>5</sub> and PIM<sub>6</sub> contain  $\alpha(1\rightarrow2)$  Manp residues and mono- and di- Manp cap like structures, respectively.

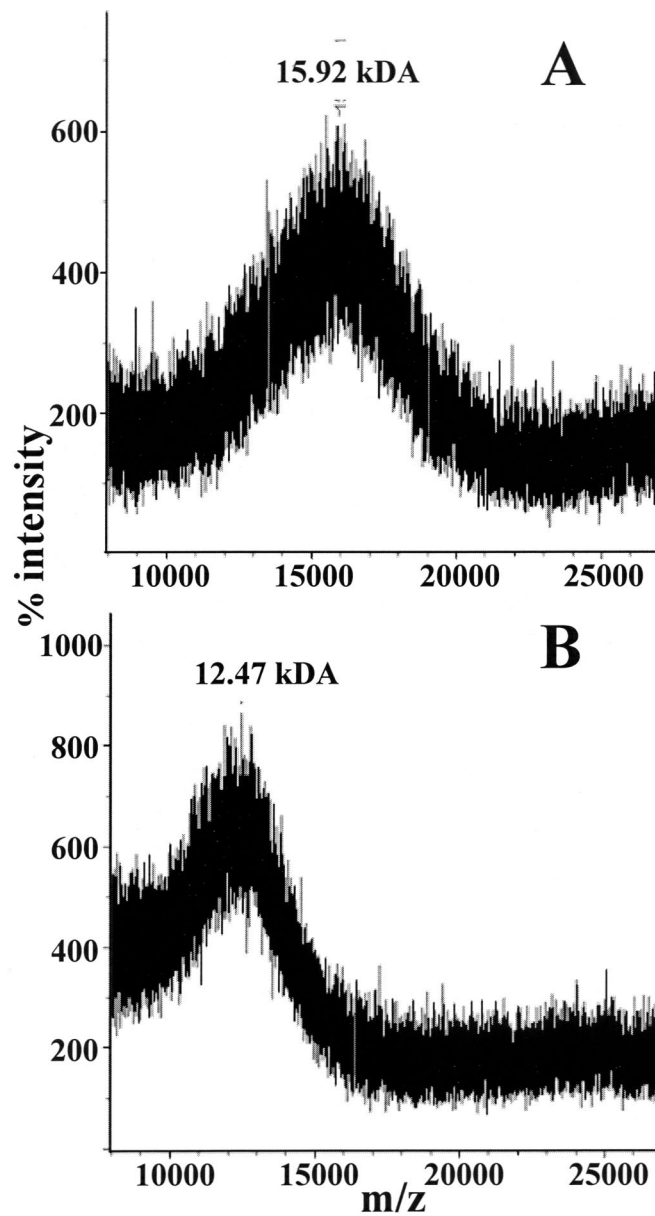

**Fig. S2.** MALDI-TOF/MS analysis of purified ManLAM from *M. tuberculosis* H37Rv and H37Rv $\Delta$ Rv2181. Shown is negative mode MS analysis of WT ManLAM (A) and mutant ManLAM (B).

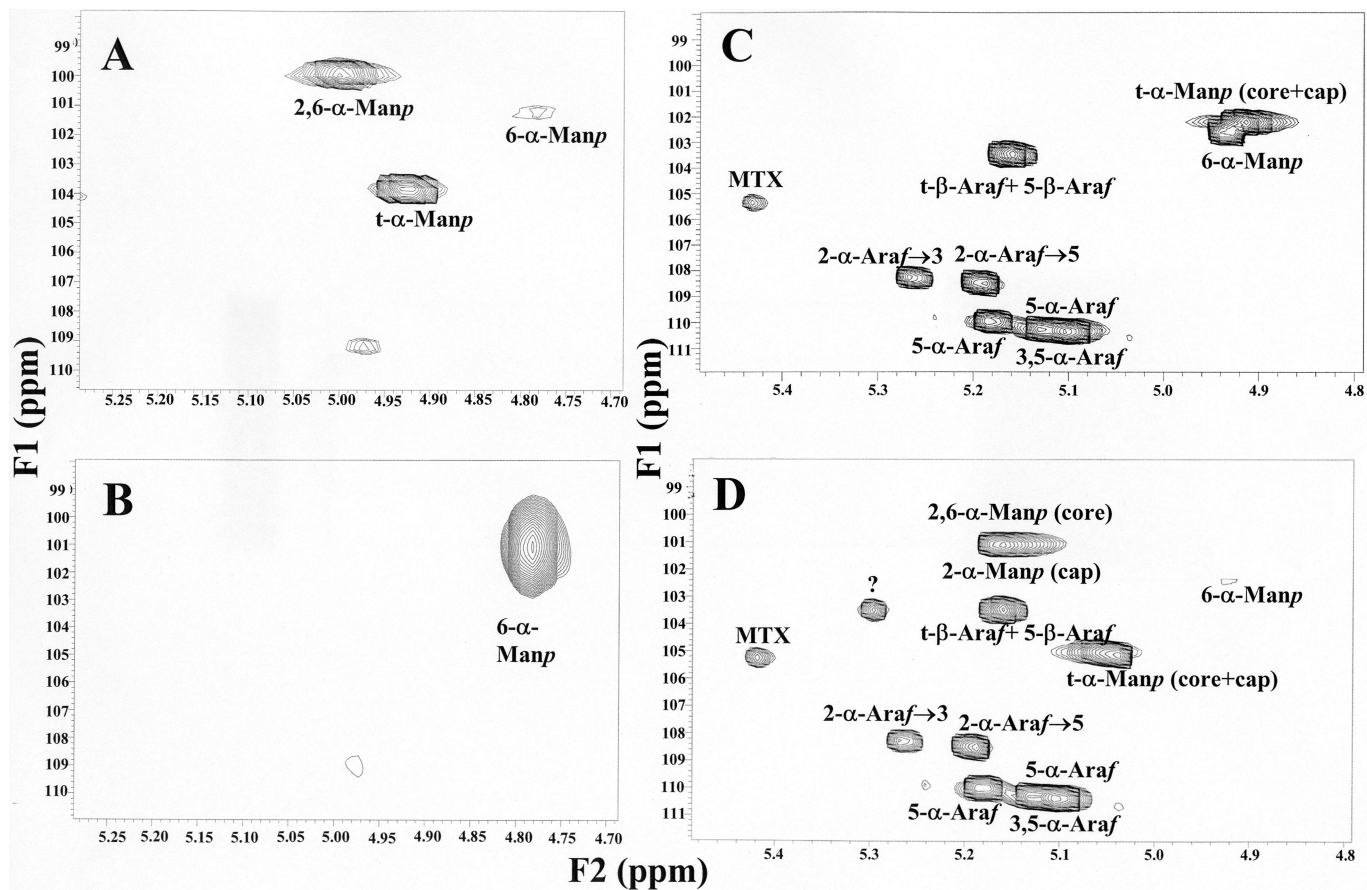

**Fig. S3.** Comparative partial two-dimensional NMR spectra of LM and ManLAM variants. The NMR  $^1\text{H}$   $^{13}\text{C}$  spectra of LM isolated from *M. tuberculosis* H37Rv (A) and H37Rv $\Delta$ Rv2181 (B) were acquired in  $\text{D}_2\text{O}$ . (C and D) Two-dimensional  $^1\text{H}$   $^{13}\text{C}$  HSQC spectra of purified ManLAM from H37Rv $\Delta$ Rv2181 (C) and *M. tuberculosis* (D). Only the expanded anomeric regions are shown. The peaks annotated with a question mark have not been assigned. MTX indicates a cross-peak characteristic of 5-deoxy-5-methyl-5-thio- $\alpha$ -xylofuranose.

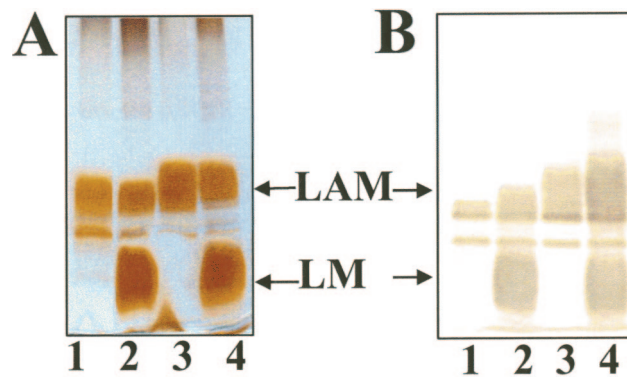

**Fig. S4.** Analysis of LM/LAM from *M. smegmatis*  $\Delta$ MSMEG\_4247/pVV16 (lanes 1),  $\Delta$ MSMEG\_4247/pVV-Rv2181 (lanes 2), MSMEG\_4247/pVV-Rv1635c (lanes 3), and MSMEG\_4247/pVV-Rv2181-Rv1635c (lanes 4). LM/LAM was extracted from cells of recombinant strains by the phenol procedure, separated on a 10–20% Tricine gel, and visualized by PAS staining (A) and Western blot with lectin Con A (B).
